# Supplementary material for: Synthesis and DFT studies of an antitumor active spiro-oxindole
Source: Royal Society of Chemistry journal article supplement (doi:10.1039/c5nj01109d), 2015-01-01
Supplement: c5nj01109d1.pdf [file c5nj01109d1.pdf]

## Synthesis and DFT studies of an antitumor active spiro-oxindole

Adel S. Girgis,<sup>\*a</sup> Ahmed F. Mabied,<sup>b</sup> Jacek Stawinski,<sup>c</sup> Lamees Hegazy,<sup>d</sup> Riham F. George,<sup>e</sup> Hanaa Farag,<sup>a</sup> ElSayed M. Shalaby<sup>b</sup> and I. S. Ahmed Farag<sup>b</sup>

<sup>a</sup> Pesticide Chemistry Department, National Research Centre, Dokki, Giza 12622, Egypt.

<sup>b</sup> X-Ray Crystallography Lab., Physics Division, National Research Centre, Dokki, Giza 12622, Egypt.

<sup>c</sup> Department of Organic Chemistry, Arrhenius Laboratory, Stockholm University, S-10691 Stockholm, Sweden.

<sup>d</sup> BioDiscovery group, Agra 282001, India.

<sup>e</sup> Pharmaceutical Chemistry Department, Faculty of Pharmacy, Cairo University, Cairo, Egypt.

\*Corresponding authors E-mail: [girgisas10@yahoo.com](mailto:girgisas10@yahoo.com); Fax: +33370931; Tel: 01220447199.

### Supplementary material

#### Table titles

**Table S1.** Selected bond lengths (Å) of compound **7** obtained from single crystal X-ray studies and theoretical calculations by AM1, PM3, and DFT methods.

**Table S2.** Selected bond angles (°) of compound **7** obtained from single crystal X-ray studies and theoretical calculations by AM1, PM3, and DFT methods.

#### Figure captions

**Figure S1.** IR spectrum of compound **7** (KBr pellet).

**Figure S2.** <sup>1</sup>H-NMR spectrum of compound **7** in CDCl<sub>3</sub>.

**Figure S3.** <sup>1</sup>H, <sup>1</sup>H-COSY spectrum of compound **7** in CDCl<sub>3</sub>.

**Figure S4.** <sup>13</sup>C-NMR spectrum of compound **7** in CDCl<sub>3</sub>.

**Figure S5.** <sup>1</sup>H, <sup>13</sup>C-Heteronuclear Single Quantum Coherence (HSQC) spectrum of compound **7** in CDCl<sub>3</sub>.

**Figure S6.** A projection of the optimized structure of compound **7** by semi-empirical AM1.

**Figure S7.** A projection of the optimized structure of compound **7** by semi-empirical PM3.

**Figure S8.** A projection of the optimized structure of compound **7** by DFT/B3LYP method with 3-21G\* basis set.

**Figure S9.** Dose response curves of compound **7** against various human tumor cell lines.

**Figure S10.** Mean Graphs of bio-assay screening of compound **7** against various human tumor cell lines.

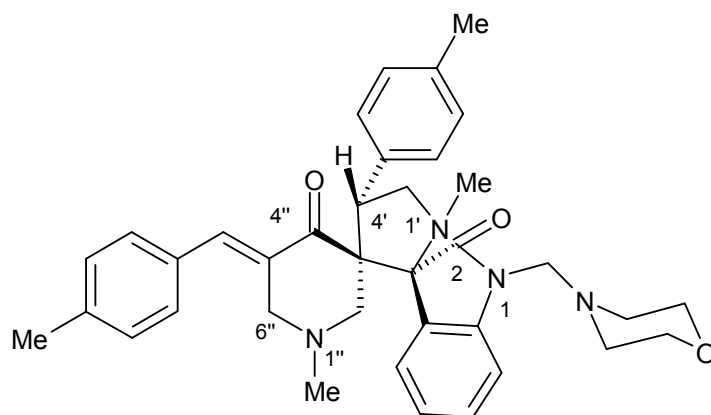

Structure of compound **7**

**Table S1.** Selected bond lengths (Å) of compound **7** obtained from single crystal X-ray studies and theoretical calculations by AM1, PM3, and DFT methods.

| Geometric parameters | Experimental X-ray data | AM1    | PM3    | DFT    |
|----------------------|-------------------------|--------|--------|--------|
| O1—C13               | 1.248 (4)               | 1.2382 | 1.2193 | 1.2468 |
| O2—C25               | 1.223 (4)               | 1.2398 | 1.2189 | 1.2460 |
| O3—C2                | 1.399 (5)               | 1.4231 | 1.4148 | 1.4617 |
| O3—C3                | 1.400 (5)               | 1.4228 | 1.4145 | 1.4670 |
| N1—C1                | 1.449 (5)               | 1.4502 | 1.4906 | 1.4859 |
| N1—C4                | 1.438 (5)               | 1.4485 | 1.4905 | 1.4922 |
| N1—C5                | 1.486 (5)               | 1.4584 | 1.4915 | 1.4722 |
| N2—C5                | 1.438 (5)               | 1.4472 | 1.4761 | 1.4753 |
| N2—C6                | 1.448 (5)               | 1.4097 | 1.4357 | 1.4144 |
| N2—C13               | 1.383 (5)               | 1.4078 | 1.4304 | 1.3823 |
| N3—C12               | 1.447 (4)               | 1.4694 | 1.5017 | 1.4778 |
| N3—C14               | 1.474 (5)               | 1.4401 | 1.4717 | 1.4733 |
| N3—C15               | 1.499 (5)               | 1.4576 | 1.4839 | 1.4810 |
| N4—C26               | 1.440 (4)               | 1.4528 | 1.4844 | 1.4767 |
| N4—C27               | 1.479 (4)               | 1.4452 | 1.4787 | 1.4749 |
| N4—C28               | 1.452 (4)               | 1.4554 | 1.4861 | 1.4717 |
| C1—C2                | 1.543 (6)               | 1.5336 | 1.5314 | 1.5350 |
| C3—C4                | 1.543 (6)               | 1.5342 | 1.5310 | 1.5297 |
| C6—C7                | 1.416 (5)               | 1.3945 | 1.3885 | 1.3874 |
| C6—C11               | 1.392 (5)               | 1.4327 | 1.4132 | 1.4073 |
| C7—C8                | 1.407 (6)               | 1.4000 | 1.3955 | 1.4035 |
| C8—C9                | 1.369 (6)               | 1.3900 | 1.3890 | 1.3947 |
| C9—C10               | 1.422 (5)               | 1.4034 | 1.3978 | 1.4046 |
| C10—C11              | 1.398 (5)               | 1.3805 | 1.3836 | 1.3843 |
| C11—C12              | 1.567 (5)               | 1.5243 | 1.5173 | 1.5177 |
| C12—C13              | 1.562 (5)               | 1.5856 | 1.5671 | 1.5626 |
| C12—C17              | 1.653 (5)               | 1.5712 | 1.5737 | 1.5920 |
| C15—C16              | 1.515 (5)               | 1.5417 | 1.5306 | 1.5517 |

|                    |           |        |        |        |
|--------------------|-----------|--------|--------|--------|
| C16—C17            | 1.545 (5) | 1.5598 | 1.5744 | 1.5866 |
| C16—C18            | 1.574 (5) | 1.4923 | 1.5030 | 1.5180 |
| C17—C25            | 1.543 (5) | 1.5286 | 1.5467 | 1.5410 |
| C17—C26            | 1.559 (5) | 1.5349 | 1.5362 | 1.5352 |
| C18—C19            | 1.383 (6) | 1.4020 | 1.3980 | 1.4019 |
| C18—C24            | 1.435 (6) | 1.4011 | 1.3963 | 1.4052 |
| C19—C20            | 1.429 (6) | 1.3923 | 1.3890 | 1.3956 |
| C20—C22            | 1.430 (7) | 1.3992 | 1.3957 | 1.4002 |
| C21—C22            | 1.568 (7) | 1.4805 | 1.4852 | 1.5189 |
| C22—C23            | 1.366 (6) | 1.3996 | 1.3954 | 1.4017 |
| C23—C24            | 1.442 (6) | 1.3925 | 1.3886 | 1.3944 |
| C25—C29            | 1.472 (4) | 1.4841 | 1.4984 | 1.4965 |
| C28—C29            | 1.534 (5) | 1.4960 | 1.4933 | 1.5147 |
| C29—C30            | 1.355 (5) | 1.3490 | 1.3448 | 1.3543 |
| C30—C31            | 1.449 (5) | 1.4535 | 1.4618 | 1.4593 |
| C31—C32            | 1.429 (5) | 1.4051 | 1.3995 | 1.4135 |
| C31—C37            | 1.419 (5) | 1.4005 | 1.3960 | 1.4114 |
| C32—C33            | 1.370 (5) | 1.3904 | 1.3880 | 1.3890 |
| C33—C34            | 1.409 (6) | 1.4010 | 1.3965 | 1.4027 |
| C34—C35            | 1.501 (6) | 1.4805 | 1.4852 | 1.5168 |
| C34—C36            | 1.420 (6) | 1.3988 | 1.3954 | 1.4015 |
| C36—C37            | 1.355 (5) | 1.3931 | 1.3890 | 1.3924 |
| RMSE               |           | 0.032  | 0.033  | 0.031  |
| Maximum difference |           | 0.088  | 0.083  | 0.067  |



**Table S2.** Selected bond angles (°) of compound **7** obtained from single crystal X-ray studies and theoretical calculations by AM1, PM3, and DFT methods.

| Geometric parameters | Experimental X-ray data | AM1    | PM3    | DFT    |
|----------------------|-------------------------|--------|--------|--------|
| C2—O3—C3             | 109.9 (3)               | 112.11 | 112.85 | 109.48 |
| C1—N1—C4             | 108.0 (3)               | 114.04 | 112.00 | 111.24 |
| C1—N1—C5             | 111.3 (3)               | 114.10 | 112.76 | 114.94 |
| C4—N1—C5             | 113.1 (3)               | 114.65 | 113.32 | 113.33 |
| C5—N2—C6             | 123.5 (3)               | 125.21 | 123.35 | 127.00 |
| C5—N2—C13            | 122.4 (3)               | 124.23 | 125.03 | 121.68 |
| C6—N2—C13            | 113.2 (3)               | 109.69 | 108.62 | 111.03 |
| C12—N3—C14           | 116.0 (3)               | 115.94 | 117.37 | 116.38 |
| C12—N3—C15           | 105.9 (3)               | 109.35 | 107.42 | 106.98 |
| C14—N3—C15           | 119.2 (3)               | 114.49 | 114.55 | 115.19 |
| C26—N4—C27           | 109.7 (3)               | 112.89 | 112.39 | 114.90 |
| C26—N4—C28           | 109.6 (3)               | 111.43 | 111.58 | 110.58 |
| C27—N4—C28           | 111.6 (3)               | 112.20 | 112.37 | 112.16 |
| N1—C1—C2             | 109.0 (4)               | 112.52 | 109.88 | 108.58 |
| C1—C2—O3             | 111.6 (4)               | 111.92 | 112.46 | 110.78 |
| O3—C3—C4             | 111.9 (4)               | 111.66 | 112.73 | 110.73 |
| C3—C4—N1             | 109.9 (4)               | 112.27 | 110.07 | 108.85 |
| N1—C5—N2             | 111.1 (3)               | 115.66 | 109.14 | 114.43 |
| N2—C6—C7             | 130.4 (4)               | 128.87 | 128.33 | 129.15 |
| N2—C6—C11            | 108.6 (3)               | 110.50 | 109.98 | 109.63 |
| C7—C6—C11            | 121.0 (4)               | 120.50 | 121.68 | 121.14 |
| C6—C7—C8             | 118.9 (4)               | 118.19 | 117.79 | 118.15 |
| C7—C8—C9             | 120.9 (4)               | 121.31 | 120.98 | 120.99 |
| C8—C9—C10            | 119.6 (4)               | 120.73 | 120.97 | 120.30 |
| C9—C10—C11           | 120.8 (4)               | 119.03 | 118.91 | 118.92 |
| C10—C11—C6           | 118.7 (4)               | 120.12 | 119.61 | 120.40 |
| C10—C11—C12          | 132.4 (3)               | 130.08 | 129.40 | 129.88 |
| C6—C11—C12           | 108.9 (3)               | 109.65 | 110.86 | 109.49 |

|             |           |        |        |        |
|-------------|-----------|--------|--------|--------|
| C11—C12—N3  | 109.6 (3) | 110.77 | 109.40 | 112.12 |
| C11—C12—C13 | 102.3 (3) | 100.47 | 100.82 | 101.40 |
| N3—C12—C13  | 113.8 (3) | 112.15 | 112.36 | 111.88 |
| C11—C12—C17 | 118.4 (3) | 115.19 | 117.51 | 118.68 |
| N3—C12—C17  | 103.1 (3) | 106.91 | 104.09 | 102.44 |
| C13—C12—C17 | 110.2 (3) | 111.43 | 112.91 | 110.63 |
| C12—C13—N2  | 106.8 (3) | 109.30 | 109.22 | 108.42 |
| C12—C13—O1  | 126.7 (3) | 126.92 | 129.31 | 127.50 |
| N2—C13—O1   | 126.3 (3) | 123.50 | 121.42 | 123.93 |
| N3—C15—C16  | 103.0 (3) | 108.62 | 105.08 | 103.21 |
| C15—C16—C17 | 102.0 (3) | 105.87 | 106.53 | 105.10 |
| C15—C16—C18 | 118.6 (3) | 112.13 | 112.52 | 113.52 |
| C17—C16—C18 | 115.8 (3) | 115.87 | 115.19 | 115.83 |
| C16—C17—C12 | 104.0 (3) | 104.82 | 104.58 | 104.06 |
| C16—C17—C25 | 112.3 (3) | 109.19 | 109.76 | 108.00 |
| C12—C17—C25 | 106.6 (3) | 109.84 | 111.13 | 107.37 |
| C16—C17—C26 | 110.8 (3) | 110.20 | 109.98 | 115.99 |
| C12—C17—C26 | 114.3 (3) | 114.21 | 114.90 | 111.60 |
| C25—C17—C26 | 108.6 (3) | 108.48 | 106.48 | 109.39 |
| C16—C18—C19 | 119.2 (4) | 118.94 | 119.16 | 119.65 |
| C16—C18—C24 | 125.9 (4) | 122.28 | 121.84 | 122.26 |
| C19—C18—C24 | 114.9 (4) | 118.75 | 118.99 | 118.08 |
| C18—C19—C20 | 121.7 (4) | 120.67 | 120.44 | 121.16 |
| C19—C20—C22 | 123.3 (4) | 120.48 | 120.39 | 120.78 |
| C21—C22—C20 | 123.2 (5) | 120.53 | 120.32 | 120.95 |
| C21—C22—C23 | 121.5 (5) | 120.53 | 120.39 | 120.92 |
| C20—C22—C23 | 115.3 (4) | 118.94 | 119.28 | 118.11 |
| C22—C23—C24 | 121.8 (5) | 120.64 | 120.30 | 121.28 |
| C23—C24—C18 | 122.8 (4) | 120.52 | 120.60 | 120.59 |
| C17—C25—O2  | 122.9 (3) | 120.93 | 121.31 | 120.36 |
| C17—C25—C29 | 116.0 (3) | 118.88 | 118.91 | 118.83 |

|                    |           |        |        |        |
|--------------------|-----------|--------|--------|--------|
| O2—C25—C29         | 121.1 (3) | 120.18 | 119.73 | 120.81 |
| C17—C26—N4         | 107.6 (3) | 112.35 | 111.40 | 106.55 |
| N4—C28—C29         | 112.3 (3) | 114.21 | 111.82 | 112.08 |
| C28—C29—C25        | 117.8 (3) | 119.45 | 118.08 | 120.12 |
| C28—C29—C30        | 125.0 (3) | 122.22 | 123.22 | 124.90 |
| C25—C29—C30        | 117.1 (3) | 118.33 | 118.64 | 114.99 |
| C29—C30—C31        | 124.5 (3) | 127.38 | 127.76 | 132.05 |
| C30—C31—C32        | 119.2 (3) | 118.60 | 118.03 | 117.05 |
| C30—C31—C37        | 120.9 (3) | 122.53 | 122.71 | 125.70 |
| C32—C31—C37        | 120.0 (3) | 118.84 | 119.22 | 117.25 |
| C31—C32—C33        | 120.3 (4) | 120.53 | 120.32 | 121.58 |
| C32—C33—C34        | 118.9 (4) | 120.51 | 120.36 | 120.77 |
| C33—C34—C35        | 119.4 (4) | 120.37 | 120.22 | 120.90 |
| C33—C34—C36        | 120.8 (4) | 119.03 | 119.35 | 118.11 |
| C35—C34—C36        | 119.8 (4) | 120.59 | 120.43 | 120.97 |
| C34—C36—C37        | 120.4 (4) | 120.57 | 120.35 | 121.39 |
| C31—C37—C36        | 119.4 (4) | 120.51 | 120.39 | 120.89 |
| RMSE               |           | 6.5    | 6.0    | 7.6    |
| Maximum difference |           | 2.49   | 2.30   | 2.33   |

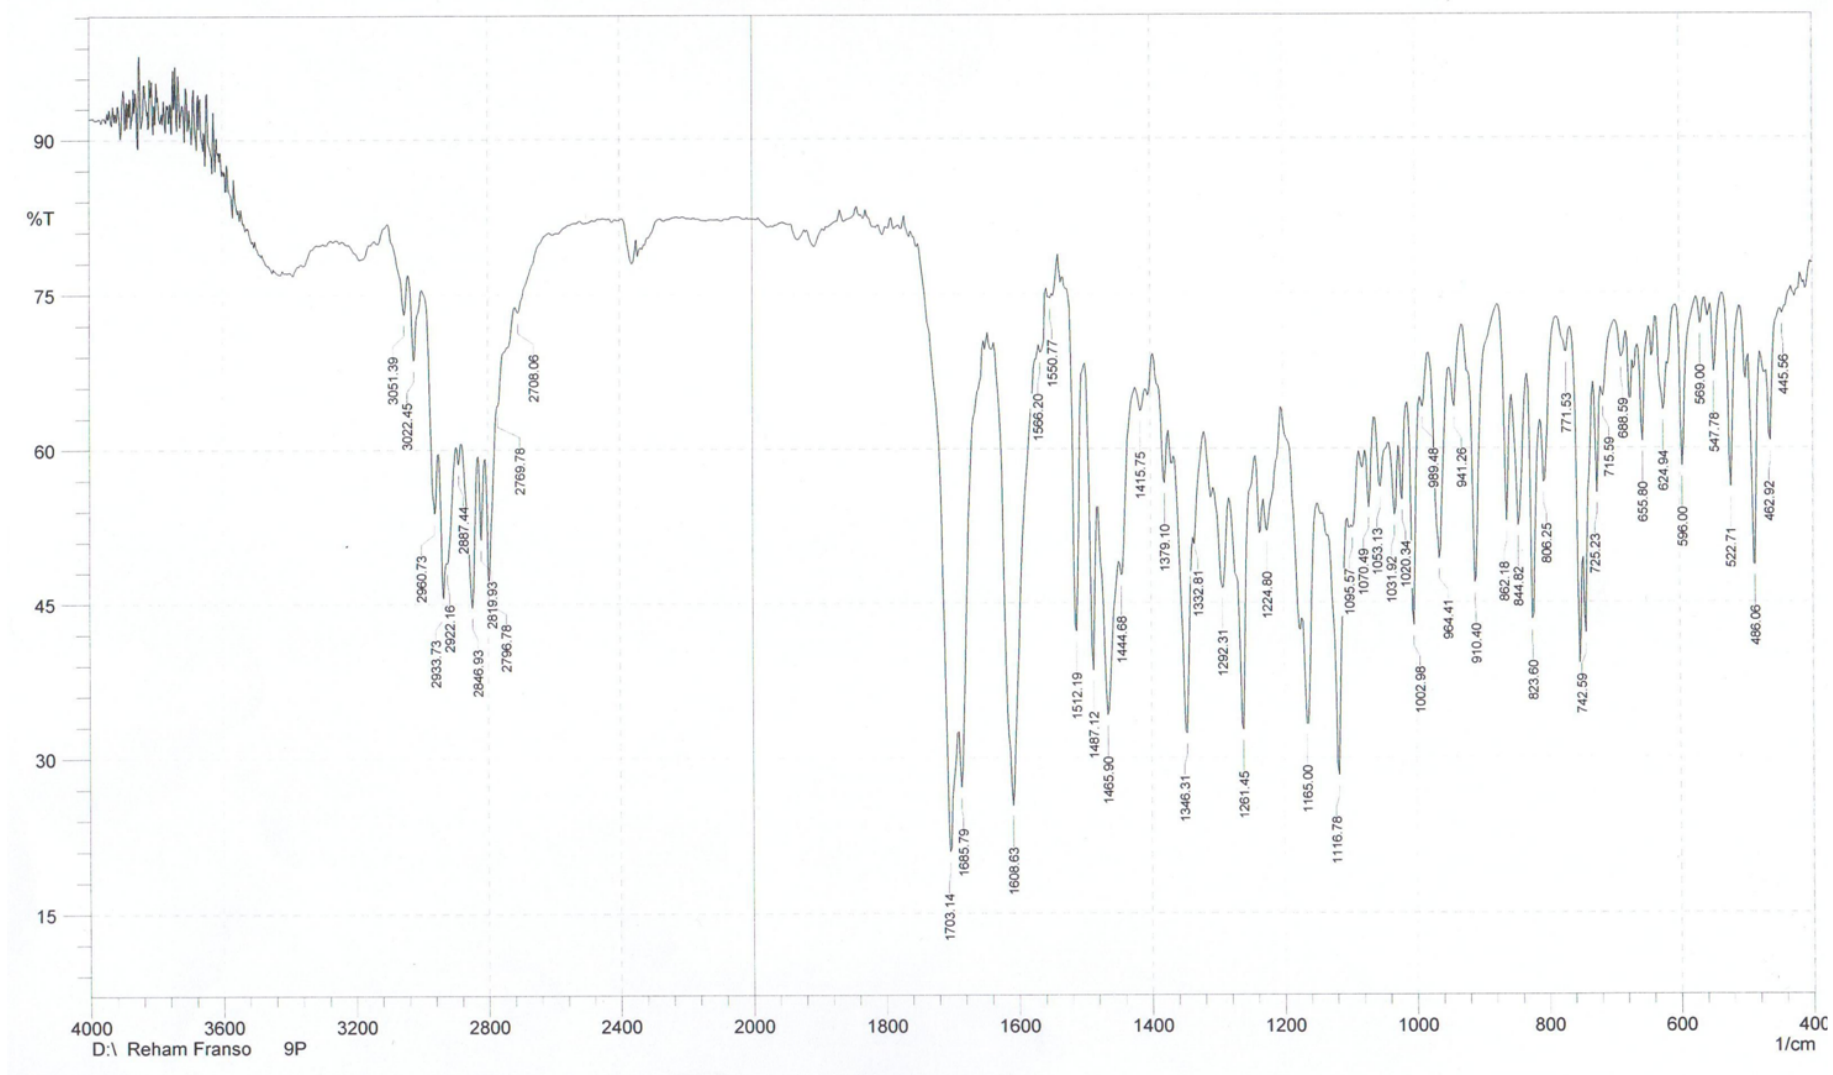

Figure S1. IR spectrum of compound 7 (KBr pellet).

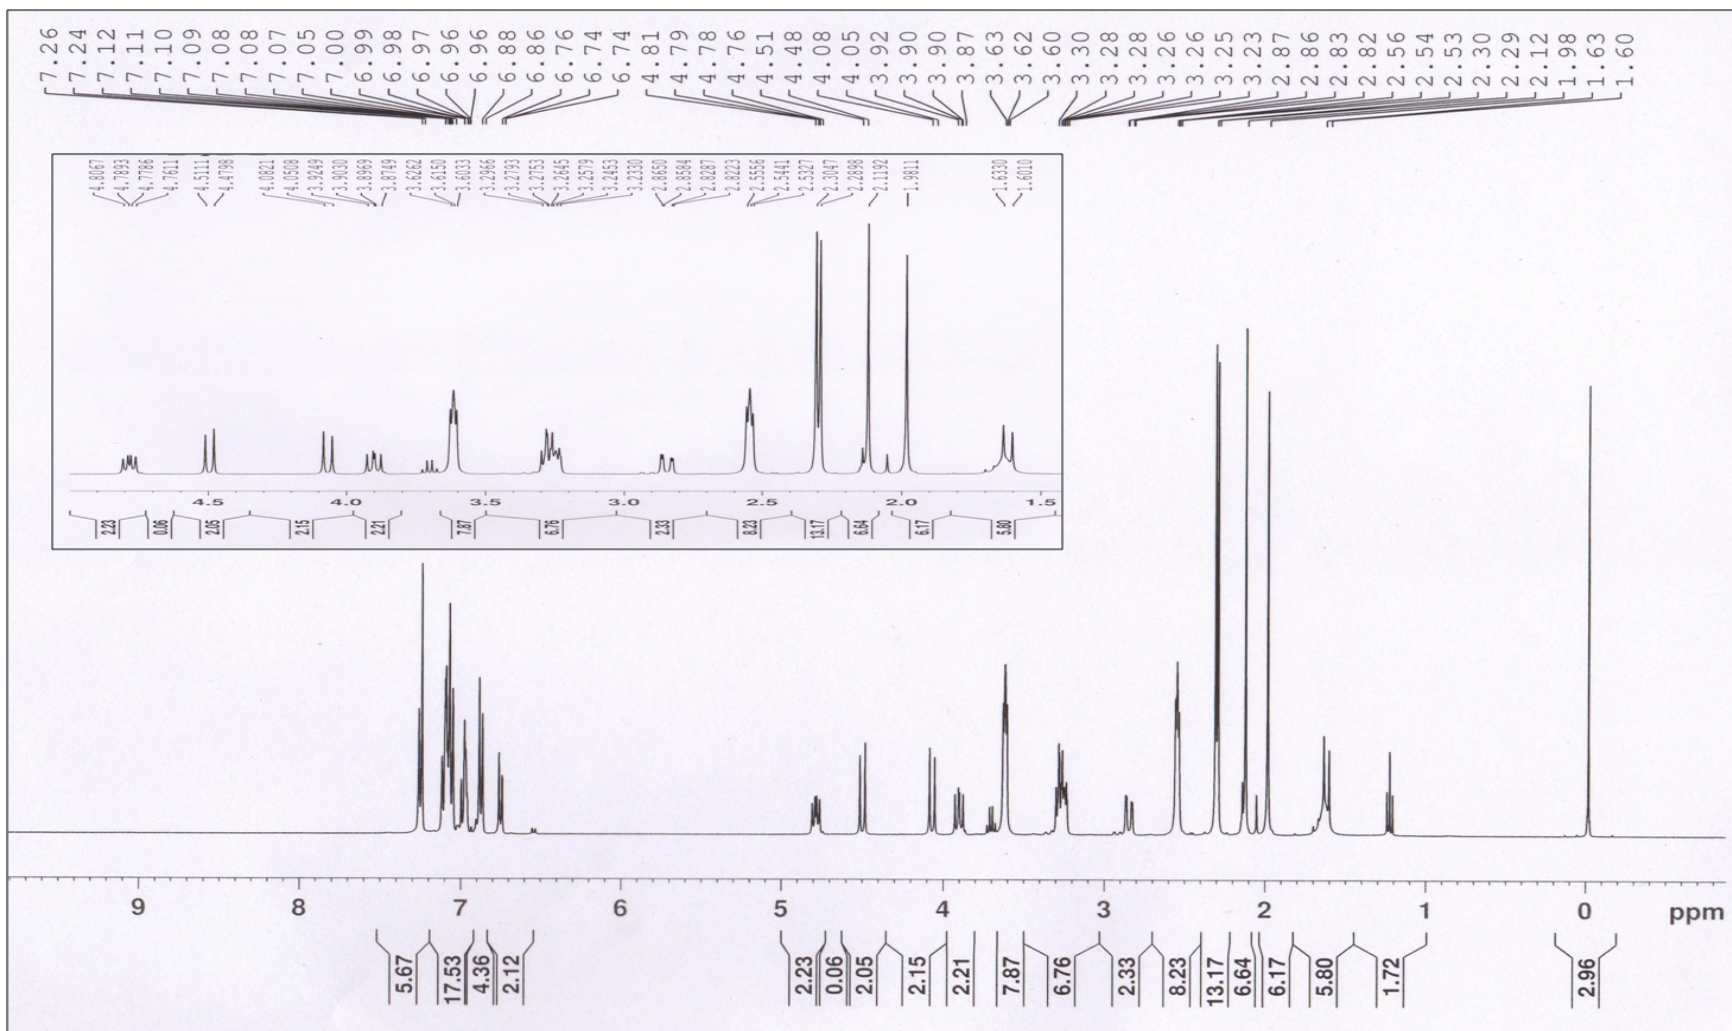

**Figure S2.** <sup>1</sup>H-NMR spectrum of compound 7 in CDCl<sub>3</sub> (signals due to trace amount of ethanol “solvent of crystallization” are observed).

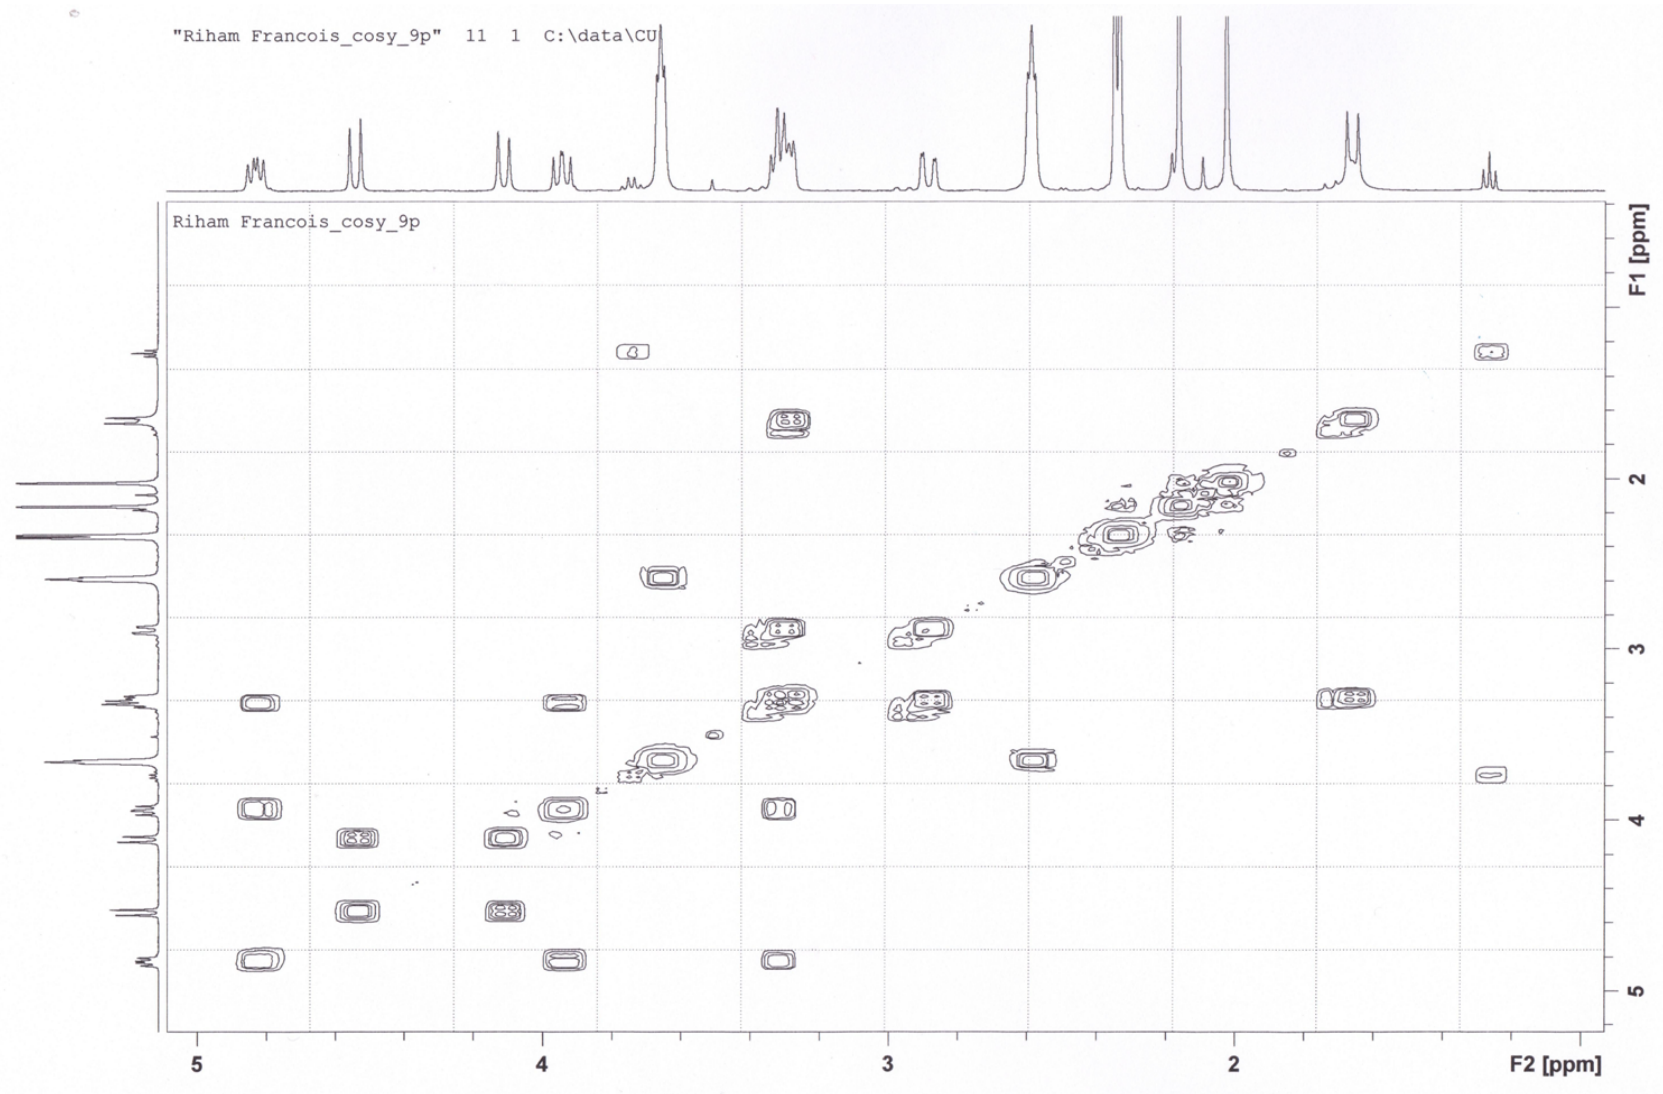

**Figure S3.**  $^1\text{H}$ ,  $^1\text{H}$ -COSY spectrum of compound **7** in  $\text{CDCl}_3$ .



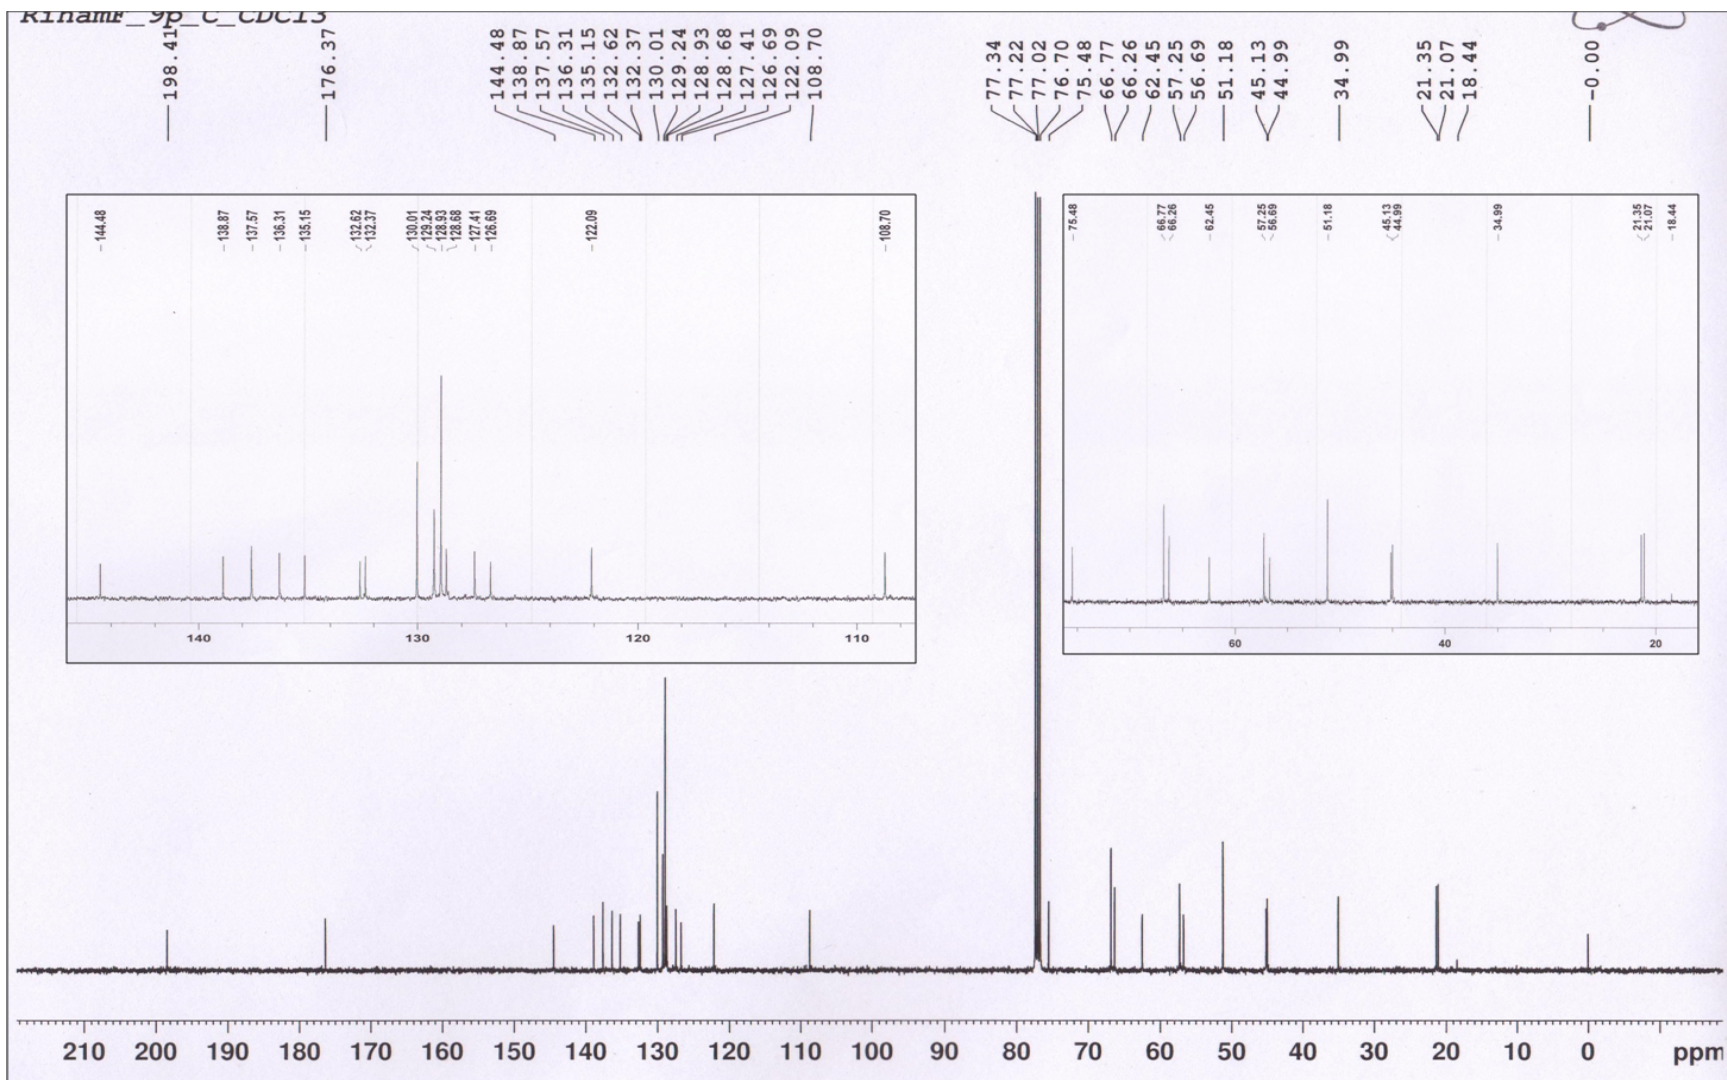

**Figure S4.**  $^{13}\text{C}$ -NMR spectrum of compound **7** in  $\text{CDCl}_3$ .

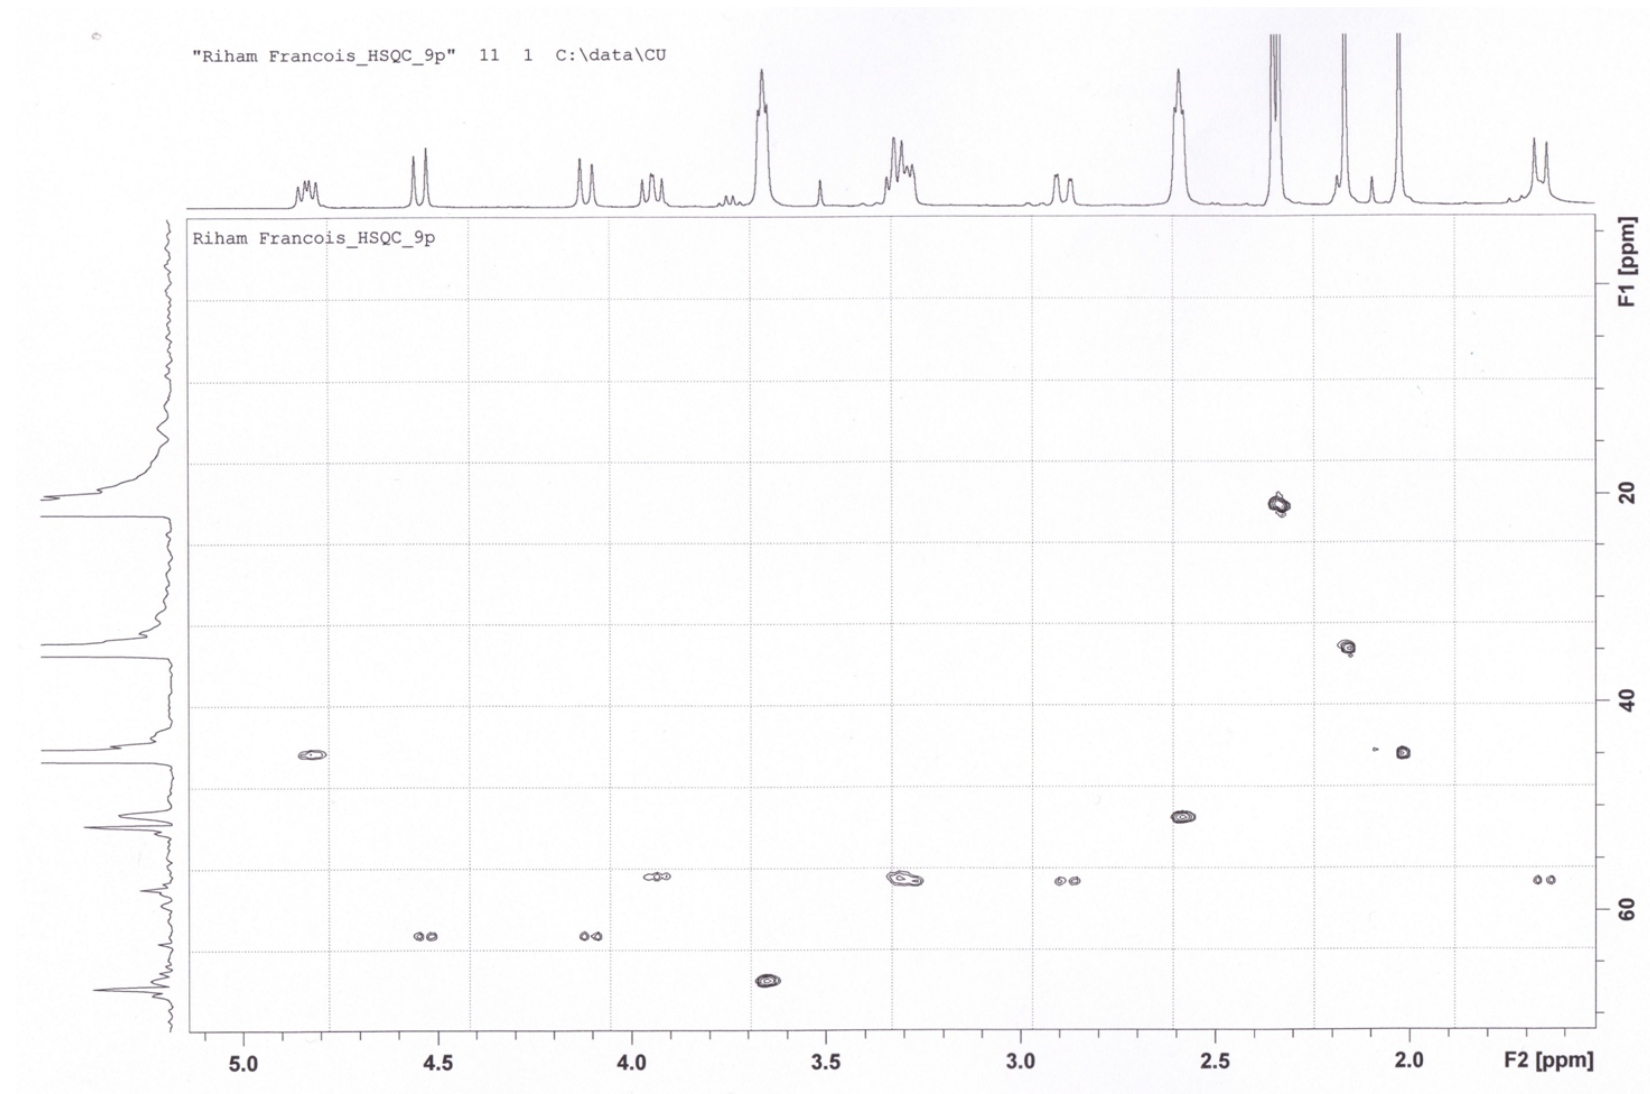

**Figure S5.**  $^1\text{H}$ ,  $^{13}\text{C}$ -Heteronuclear Single Quantum Coherence (HSQC) spectrum of compound **7** in  $\text{CDCl}_3$ .



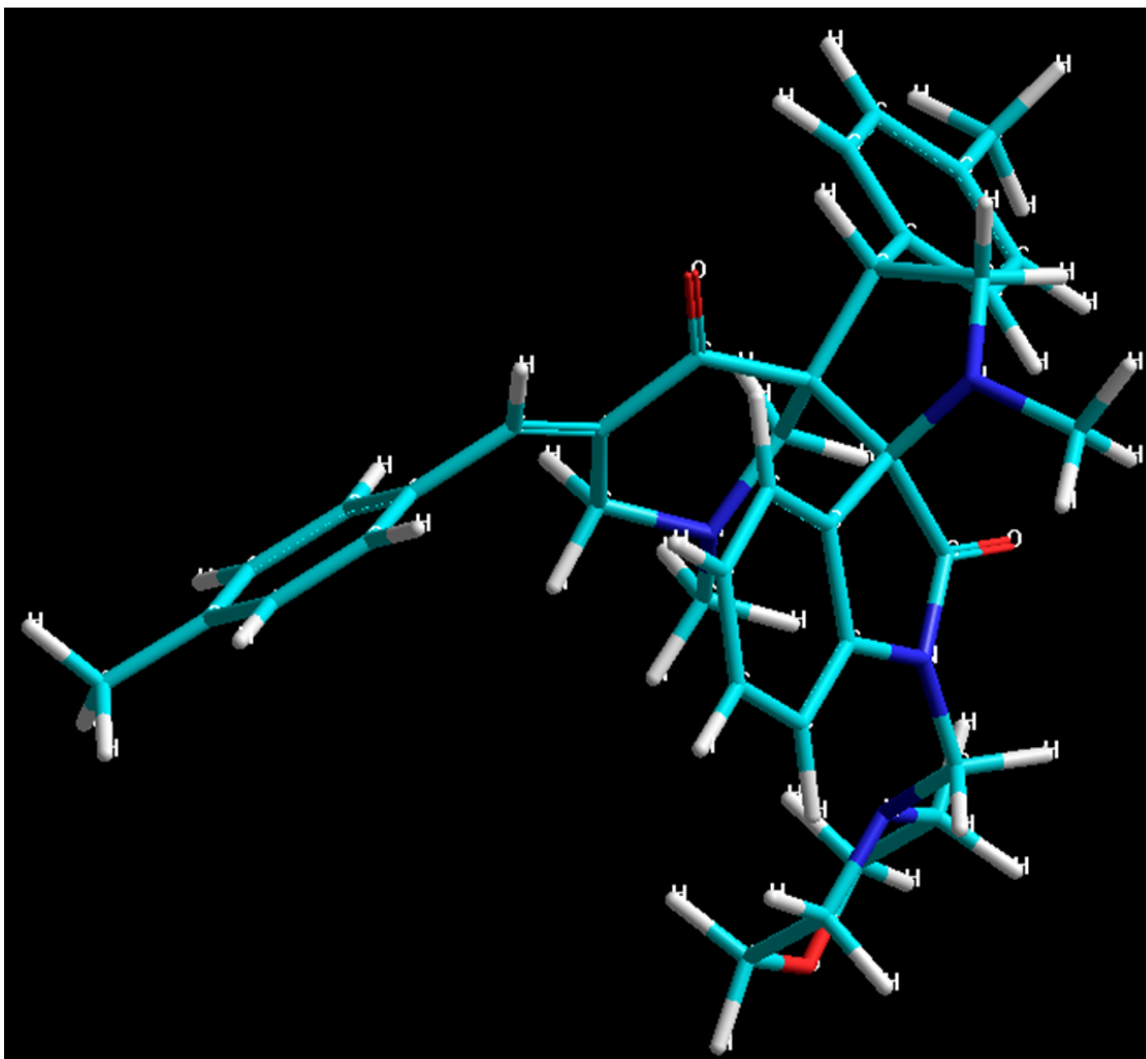

**Figure S6.** A projection of the optimized structure of compound 7 by semi-empirical AM1.

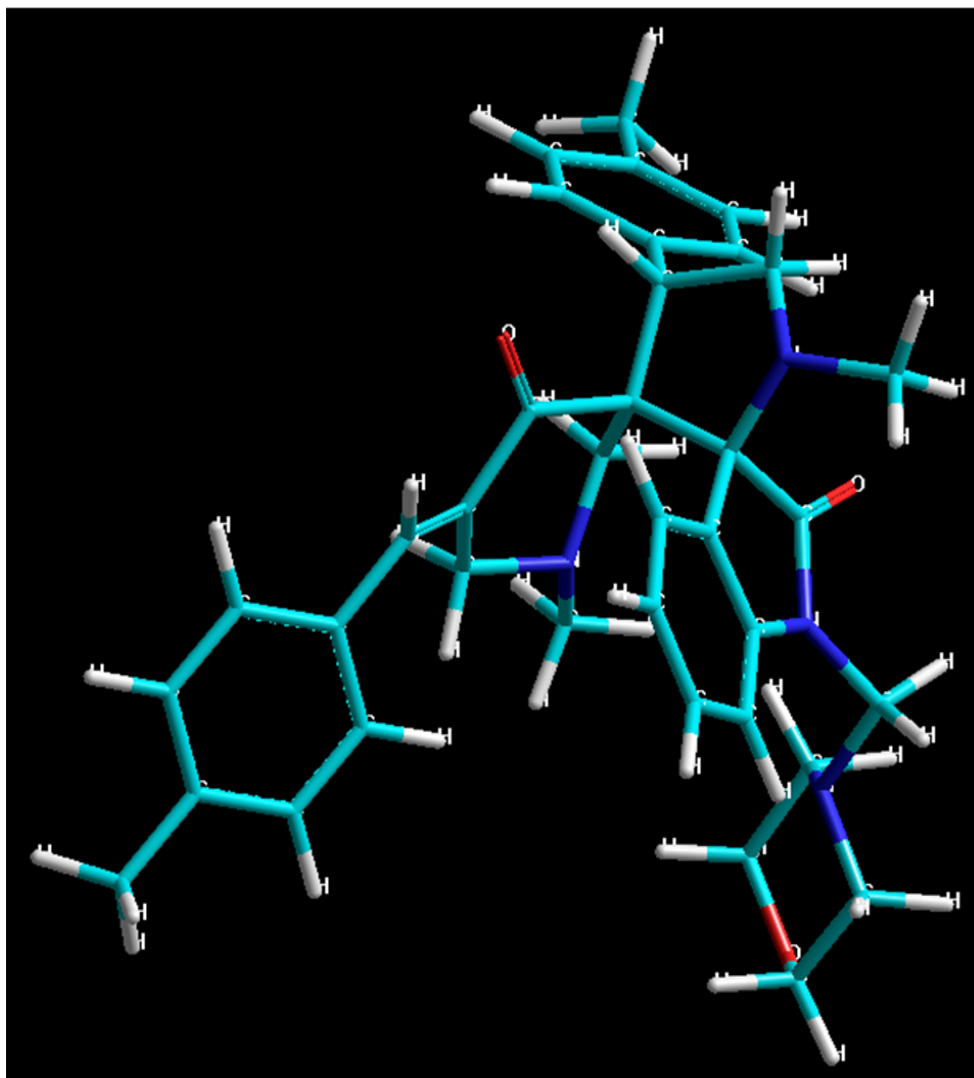

**Figure S7.** A projection of the optimized structure of compound **7** by semi-empirical PM3.

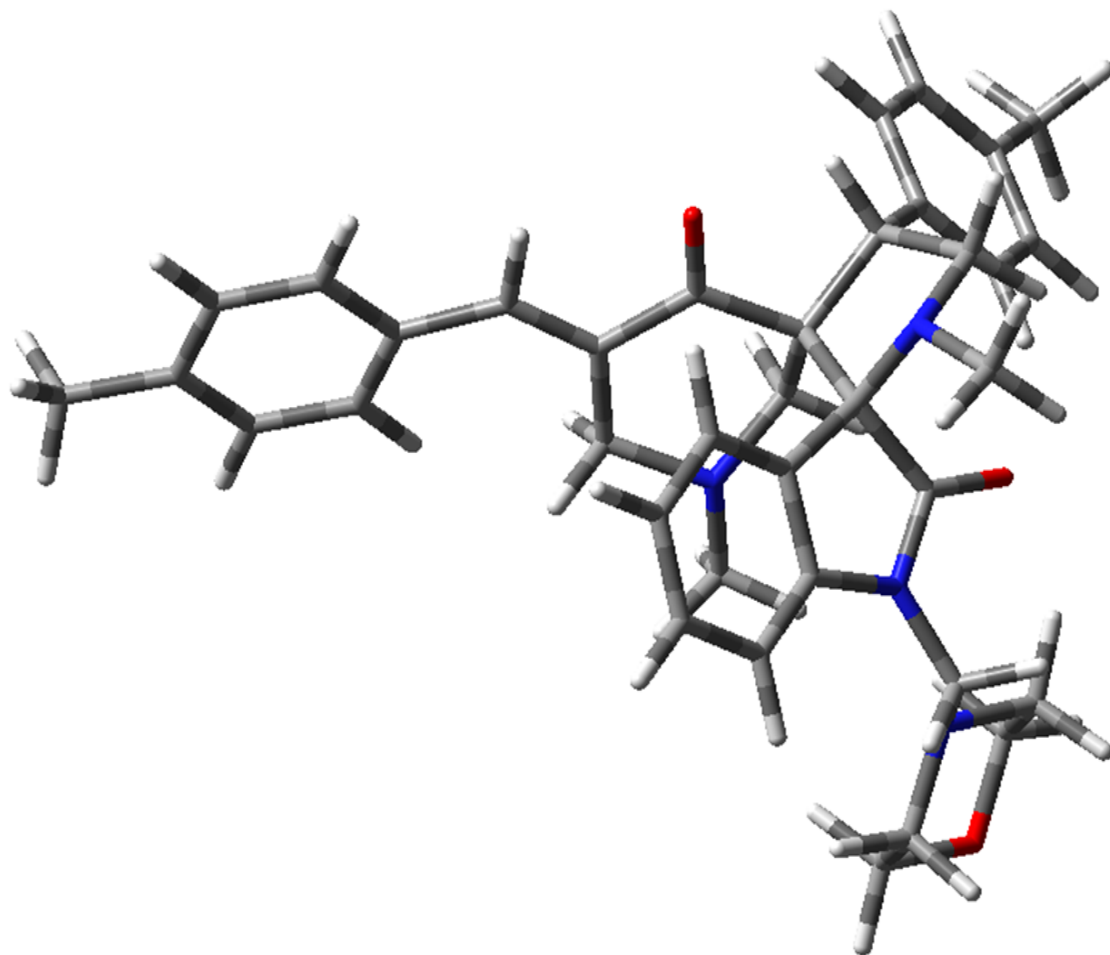

**Figure S8.** A projection of the optimized structure of compound 7 by DFT/B3LYP method with 3-21G\* basis set.

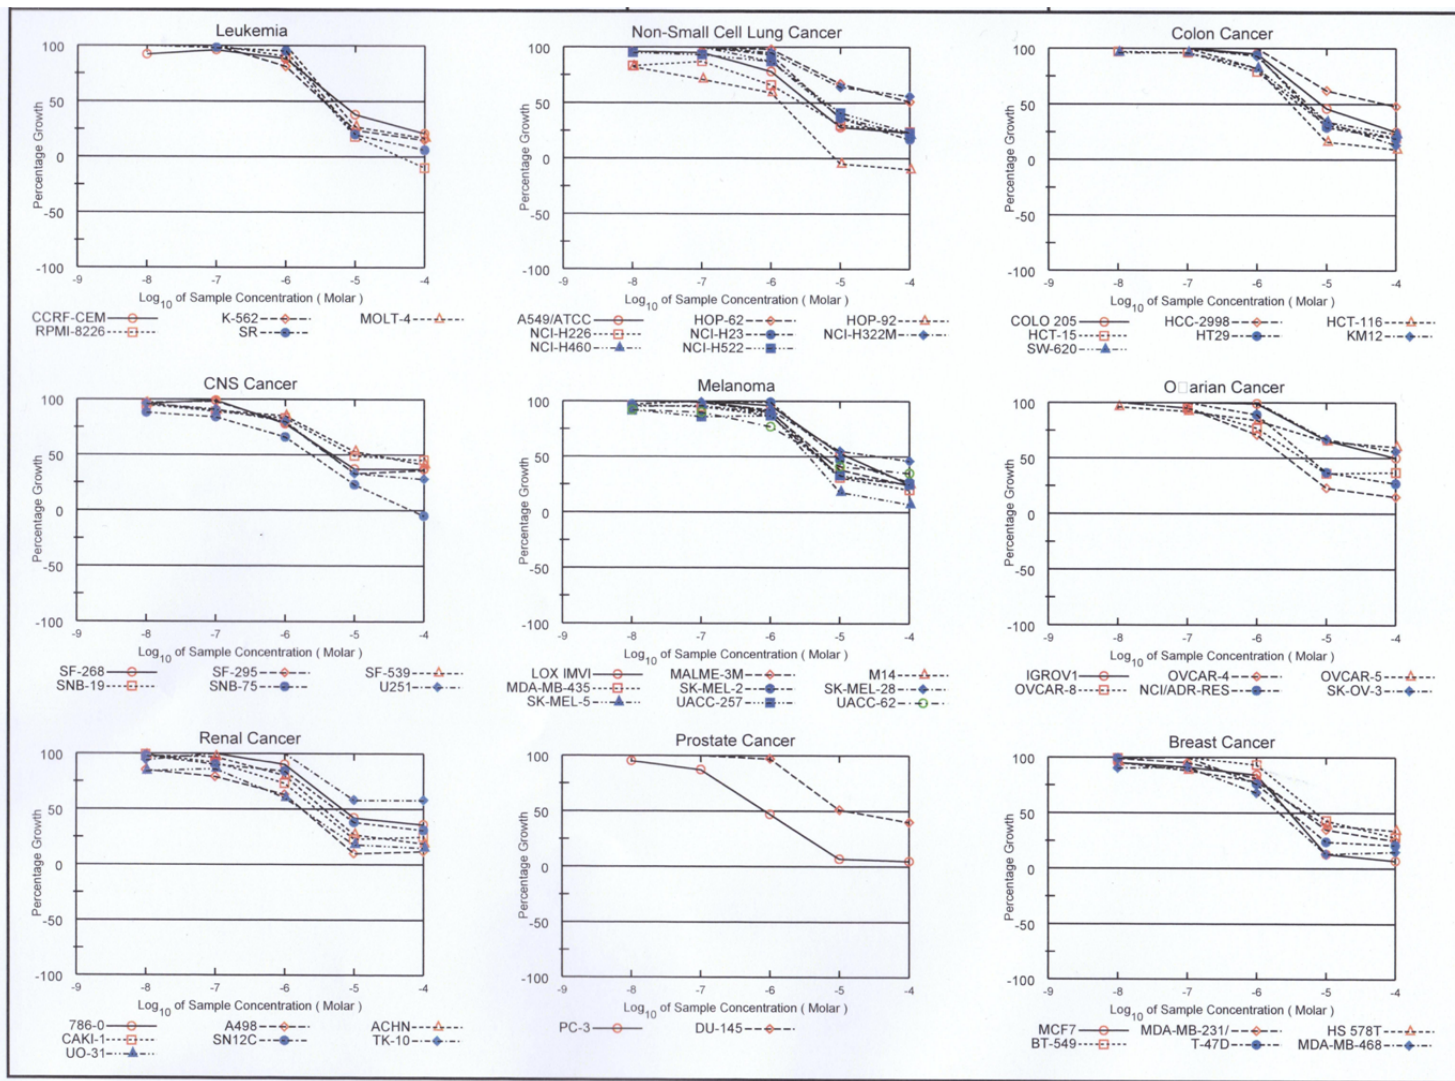

Figure S9. Dose response curves of compound 7 against various human tumor cell lines.

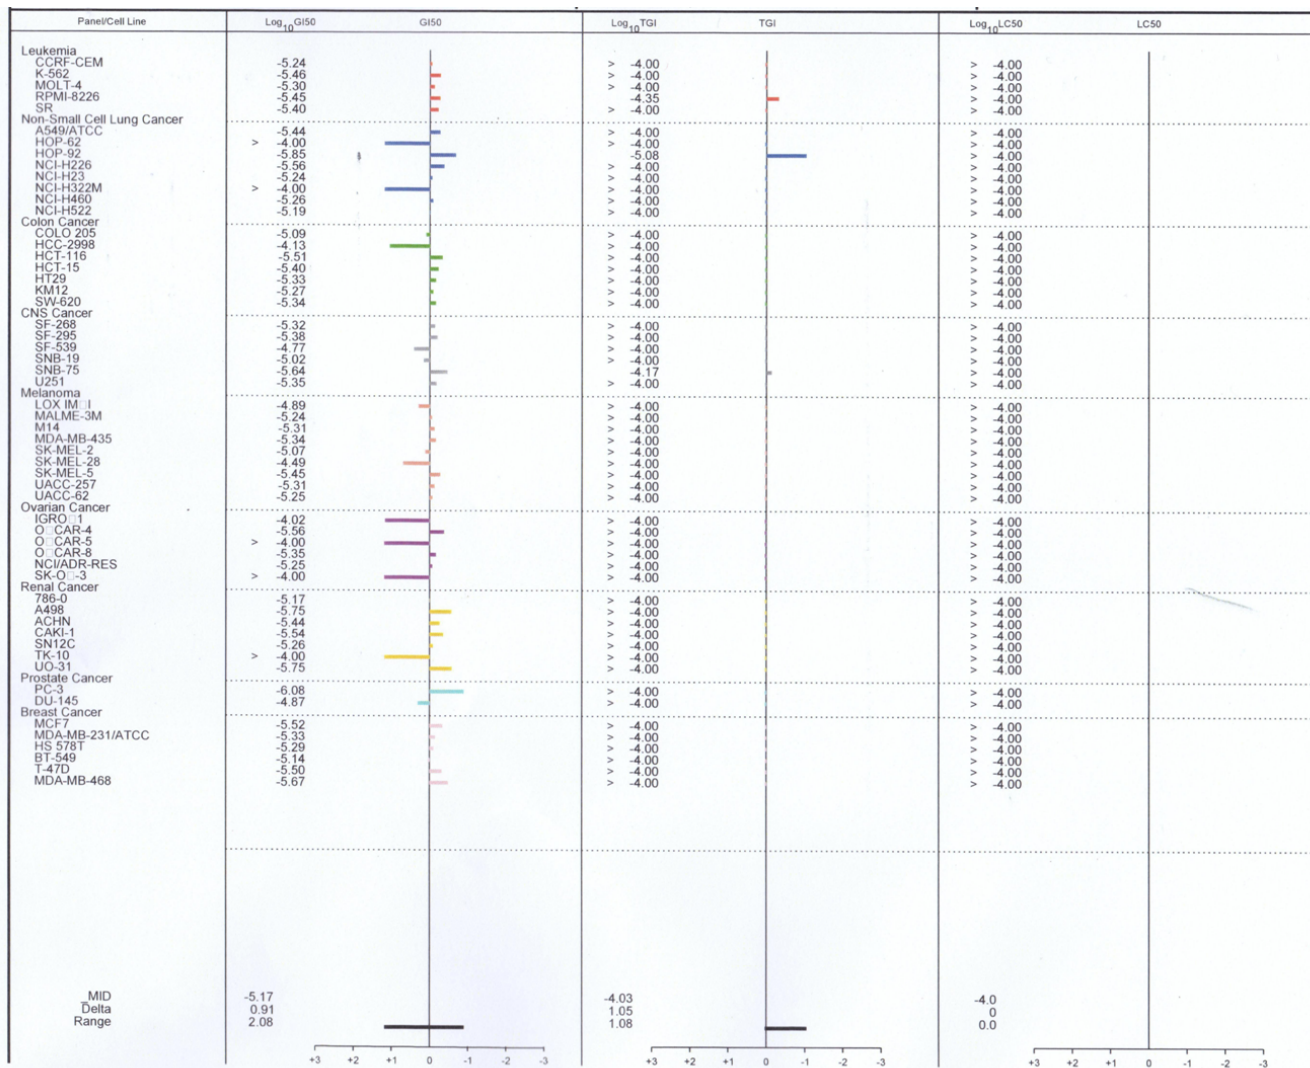

**Figure S10.** Mean Graphs of bio-assay screening of compound 7 against various human tumor cell lines.
